# Supplementary material for: Post-interval EEG activity is related to task-goals in temporal discrimination
Source: PLOS journal article supplement (doi:10.1371/journal.pone.0257378), 2021-09-27
Supplement: S2 (10.1371/journal.pone.0257378.s002) [file journal.pone.0257378.s002]

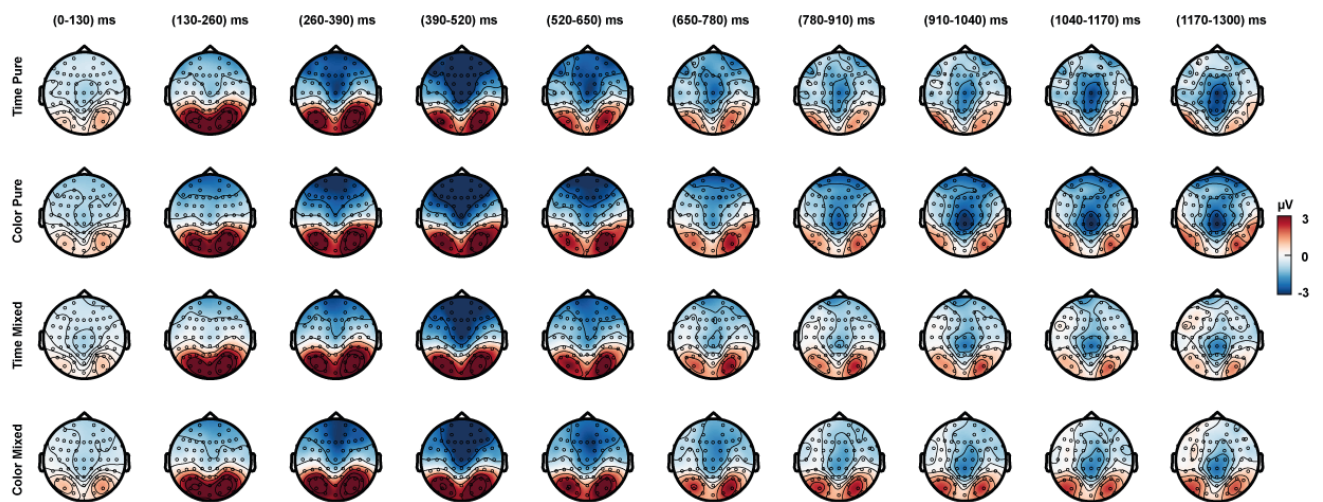

Fig S2. Topographies by task at S1 Onset. Mean topographies of the EEG signal in 130 ms windows during S1 onset for trials longer than 1300ms. Each row represents a different task condition.
